# Supplementary material for: Identification of Primary Antimicrobial Resistance Drivers in Agricultural Nontyphoidal Salmonella enterica Serovars by Using Machine Learning
Source: mSystems. 2019 Aug 6;4(4):e00211-19. doi: 10.1128/mSystems.00211-19 (PMC6687941; doi:10.1128/mSystems.00211-19)
Supplement: FIG S5 [file mSystems.00211-19-sf005.pdf]

Plasmid Coverage

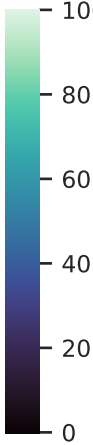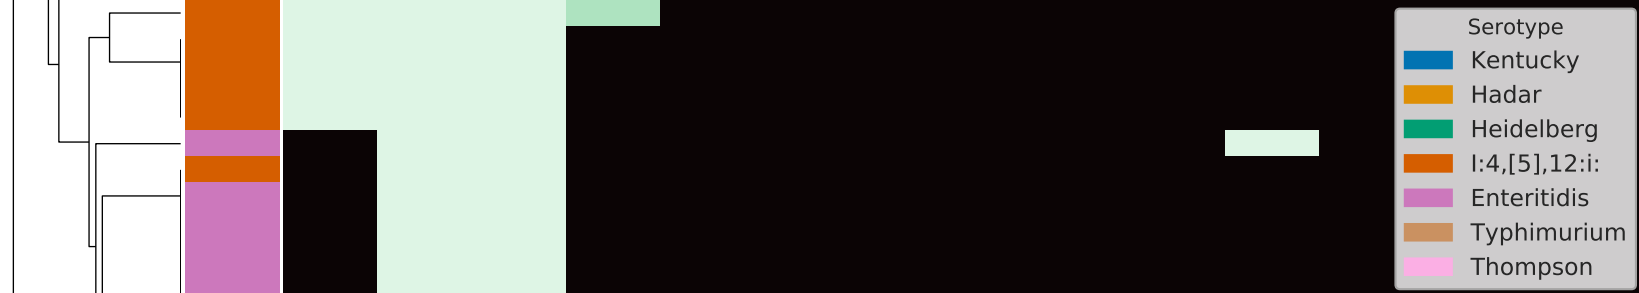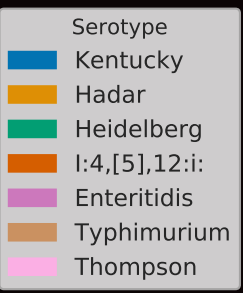

ID

Serotype  
IncI1\_1\_Alpha  
IncFIB(S)\_1  
IncFII(S)\_1  
ColRNAI\_1  
IncFIB(AP001918)\_1  
IncFIC(FII)\_1  
Col(MG828)\_1  
IncX1\_3  
IncX1\_1  
ColpVC\_1  
Col156\_1  
IncB/O/K/Z\_4  
IncA/C2\_1  
IncFIB(pHCM2)\_1\_pHCM2  
Col(KPH56)\_1  
Col8282\_1

3333  
1892  
1893  
1811  
1803  
3176  
3171  
3126  
3128  
3352  
3339  
3303  
3181  
3180  
3169  
3167  
3143  
2005  
2003  
1797  
1792  
1793  
1891  
1888  
1890  
3314  
3144  
3132  
3134  
3349  
3337  
3336  
3323  
3319  
3318  
3315  
3313  
3311  
3310  
3145  
3302  
3322  
3351  
3324  
3305  
3306  
3317  
3344  
3341  
3338  
3326  
3321  
3184  
3179  
1783  
1758  
1778  
1775  
3342  
3332  
3140  
3168  
1772  
1773  
1771  
1770  
1769  
1768  
1767  
1766  
1760  
1762  
3193  
3197  
3200  
3199  
3138  
3139  
3198  
3166  
3162  
3151  
3160  
3142  
3149  
3147  
3125  
3146  
3186  
3353  
3191  
3348  
3156  
3133  
3137  
3135  
3158
