# Supplementary material for: Identification of Primary Antimicrobial Resistance Drivers in Agricultural Nontyphoidal Salmonella enterica Serovars by Using Machine Learning
Source: PubMed Central journal article supplement (PMC6687941; doi:10.1128/msystems.00211-19), 2019-08-06

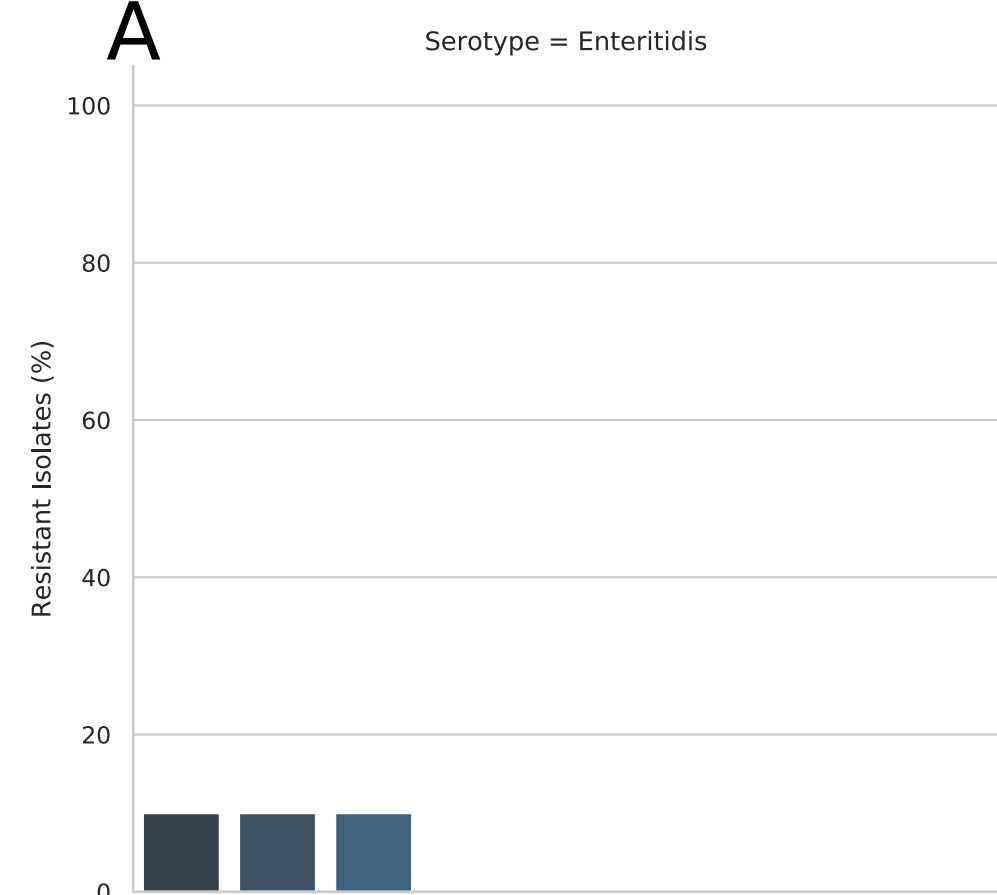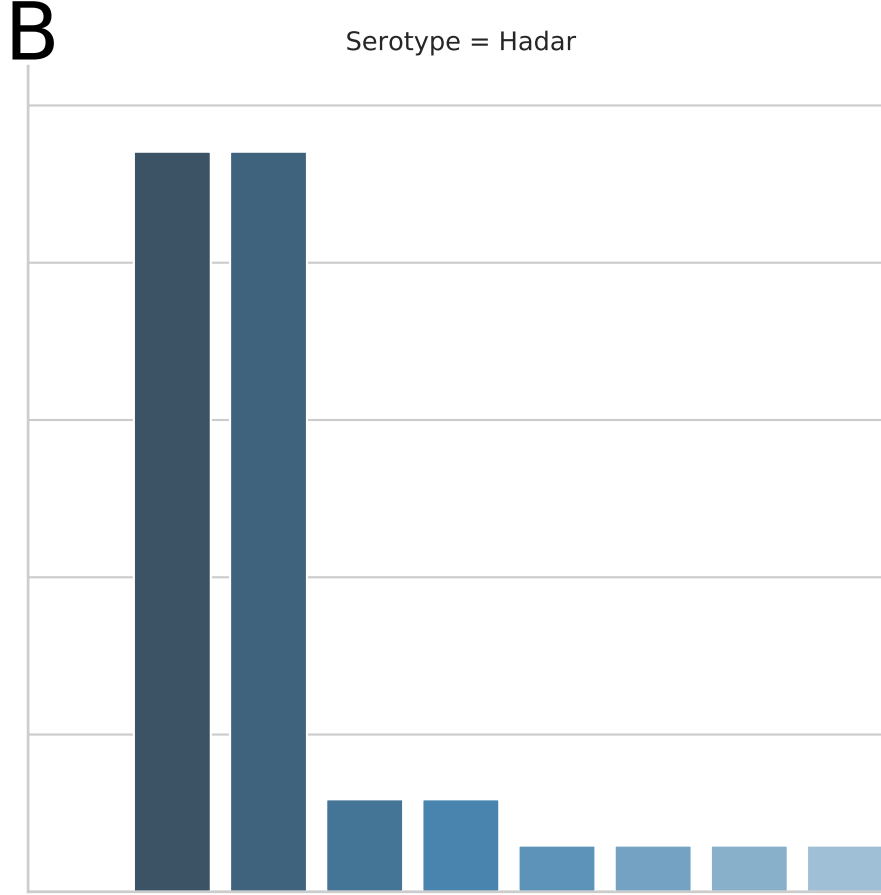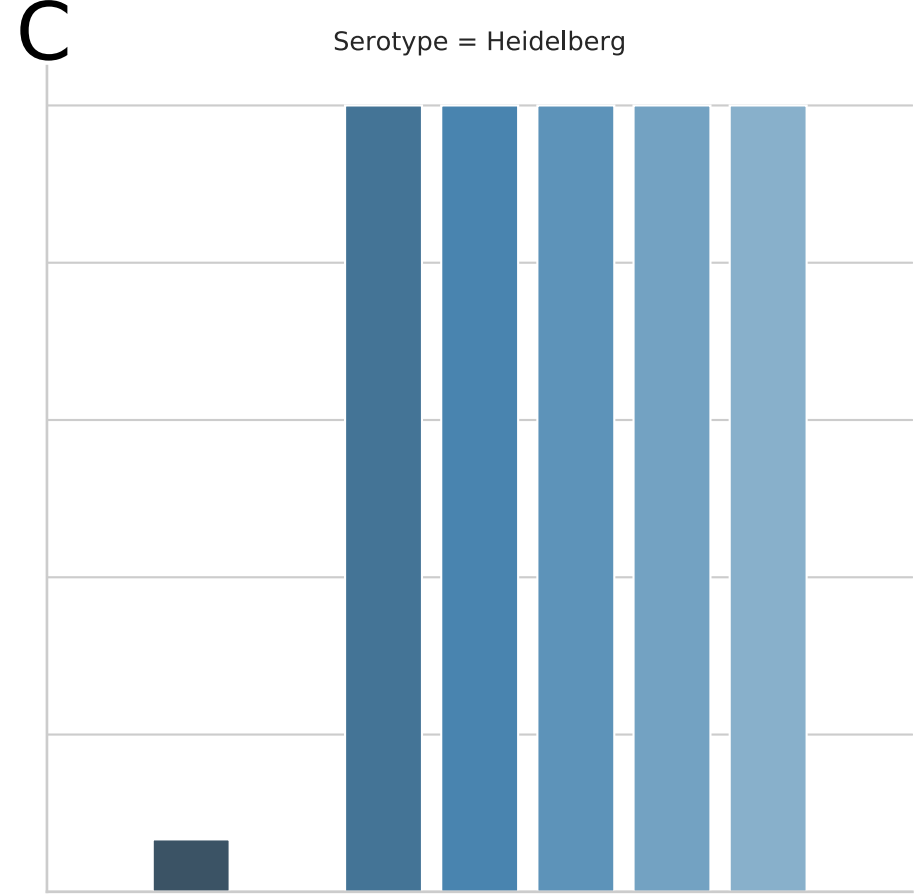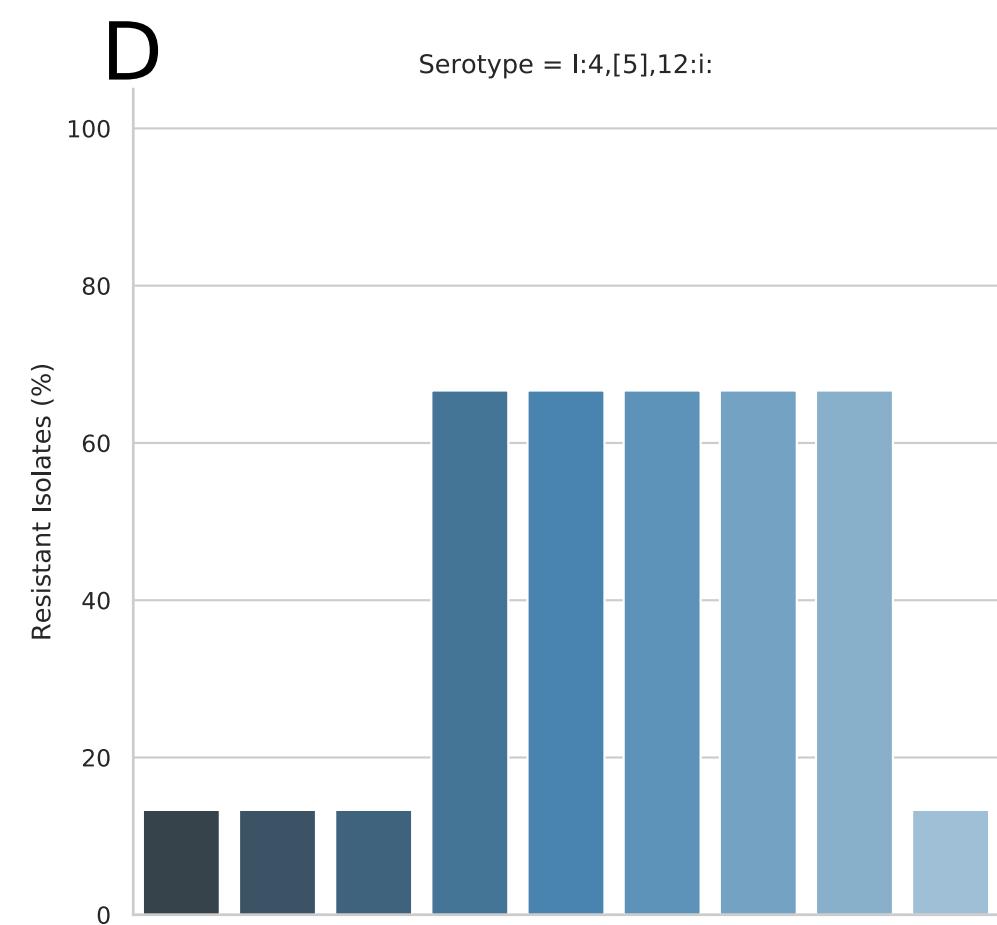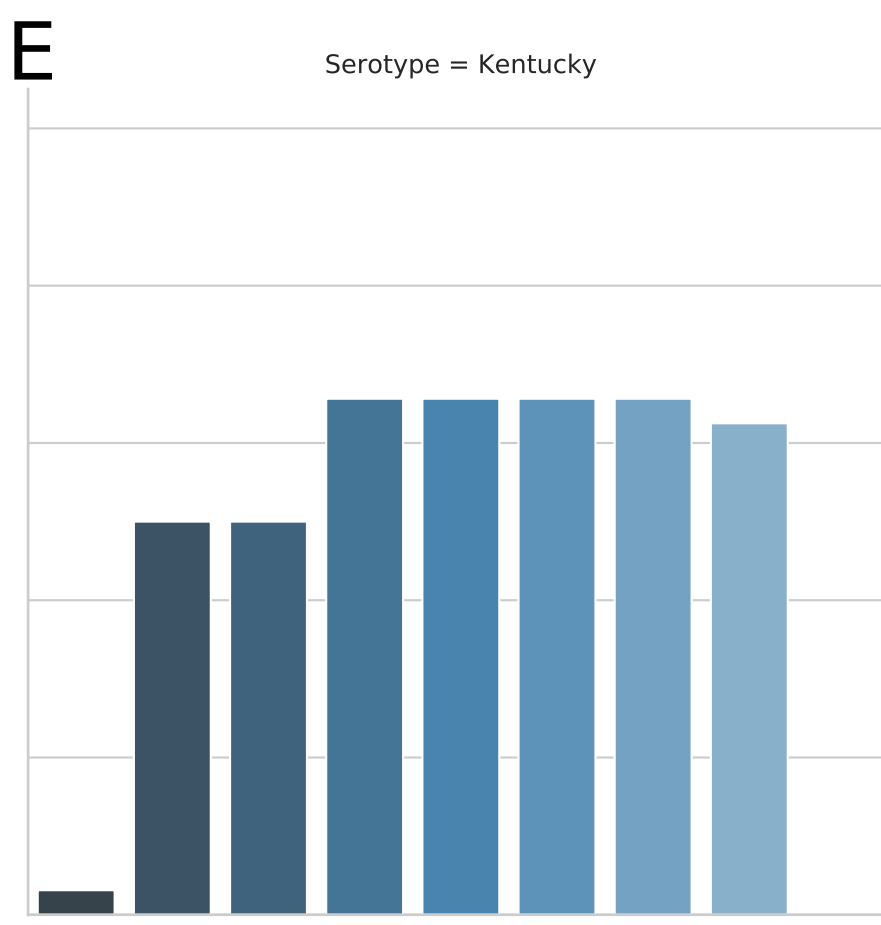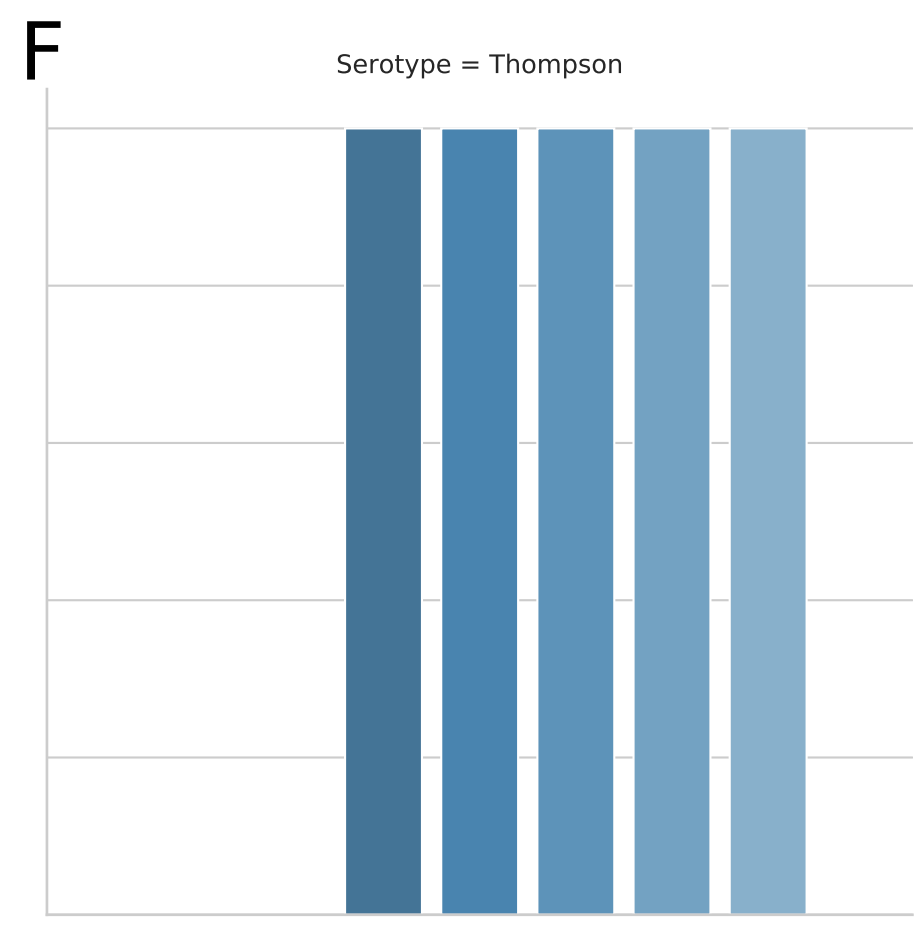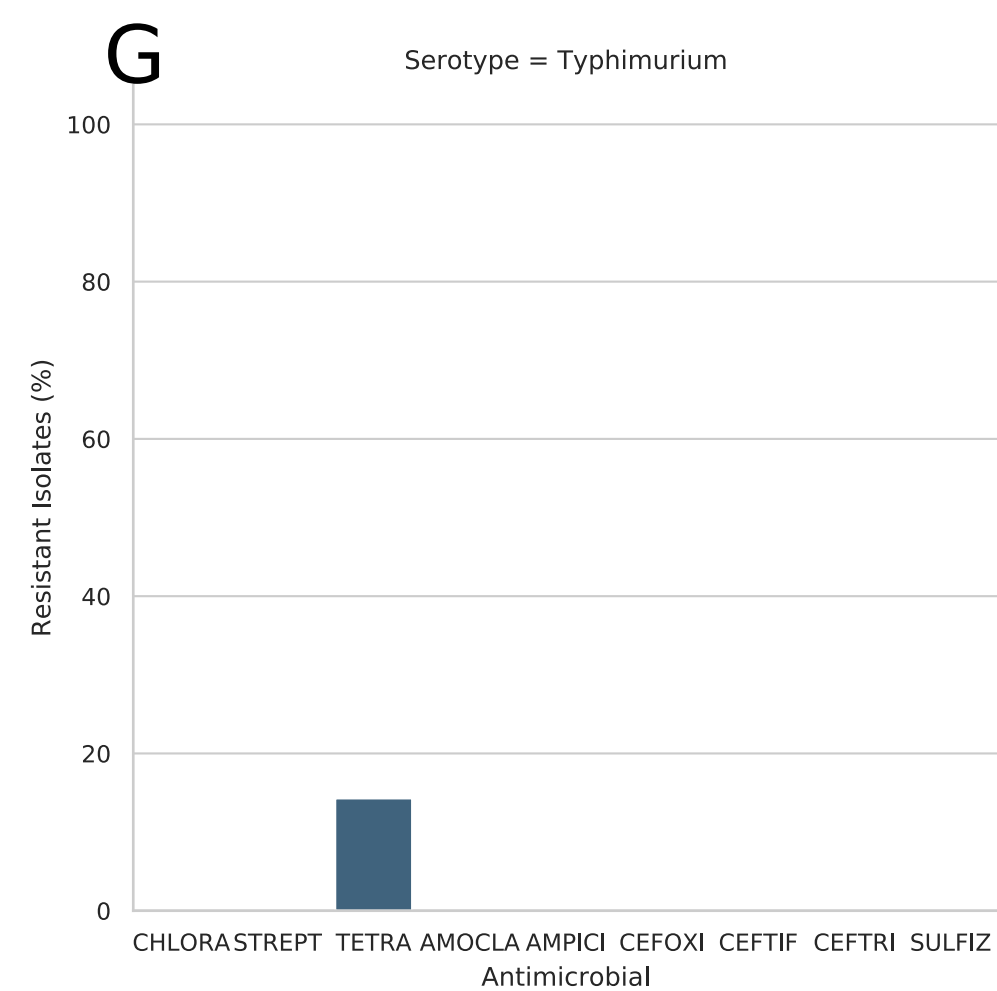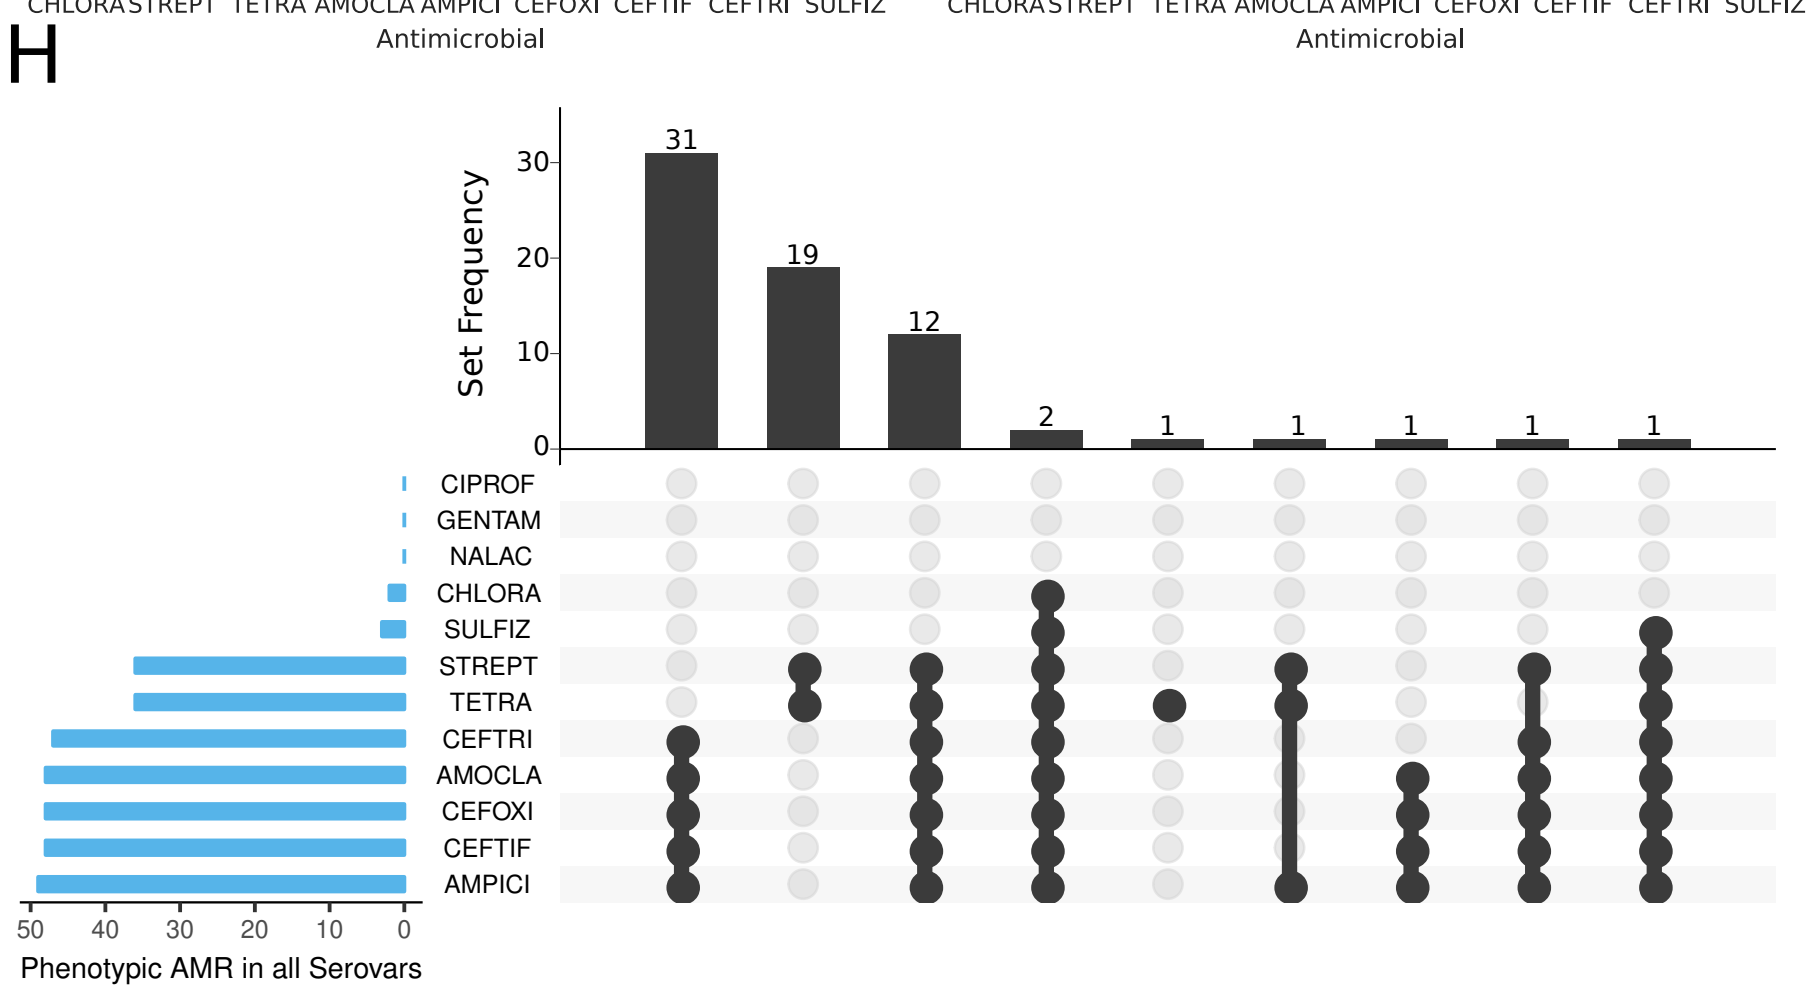

Supplement: mSystems.00211-19-sf001.pdf [file mSystems.00211-19-sf001.pdf]
