# Supplementary material for: Identification of Primary Antimicrobial Resistance Drivers in Agricultural Nontyphoidal Salmonella enterica Serovars by Using Machine Learning
Source: PubMed Central journal article supplement (PMC6687941; doi:10.1128/msystems.00211-19), 2019-08-06

HP= Hypothetical proteins

Resistant to  $\beta$ -lactams **3184\_16\_CMY-2**

20Kb-region

3',5'-cyclic-  
np

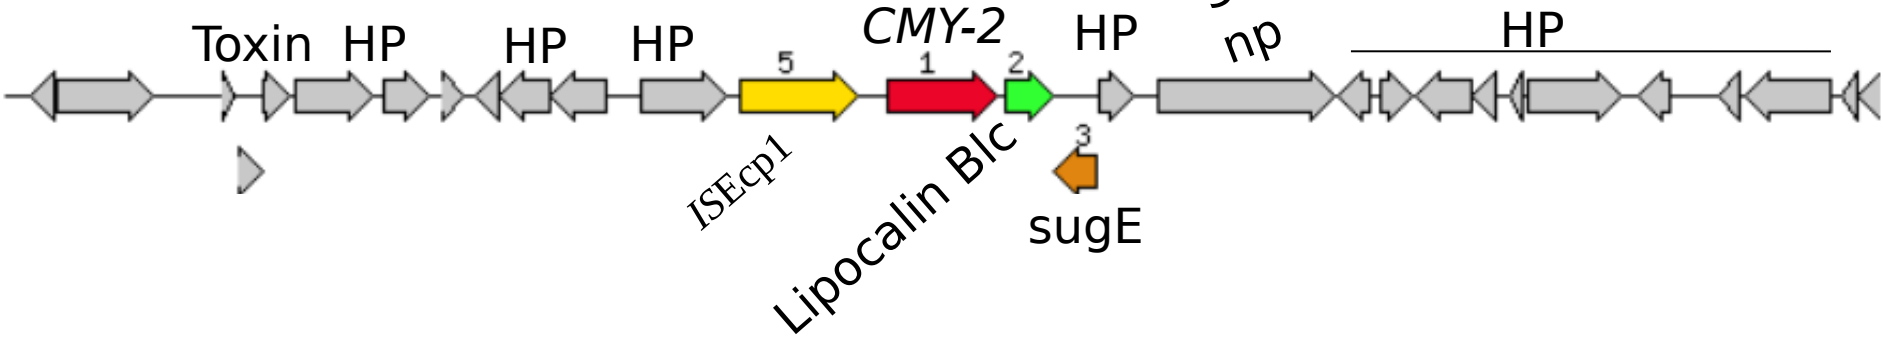

Susceptible to  $\beta$ -lactams **3338\_18\_CMY-2**

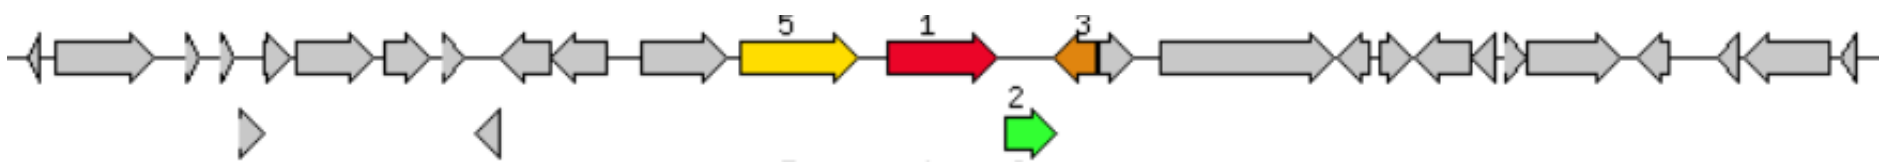

Susceptible to  $\beta$ -lactams **3126\_15\_CMY-2**

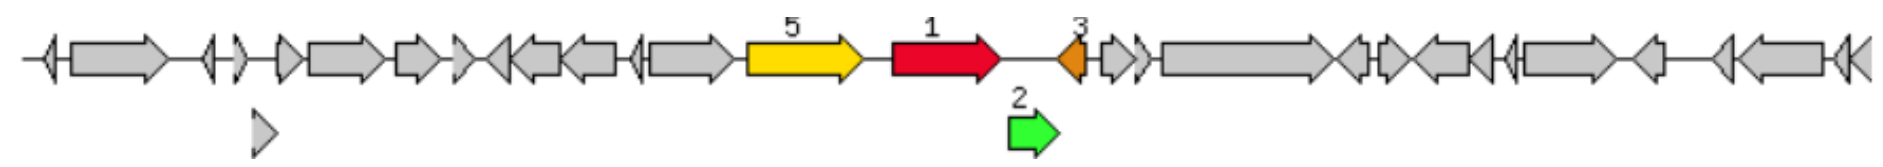

Supplement: mSystems.00211-19-sf004.pdf [file mSystems.00211-19-sf004.pdf]
